# Supplementary material
Source: PubMed Central journal article supplement (PMC4914866)
Supplement: DS_10.1177_0022034516641053.pdf [file DS_10.1177_0022034516641053.pdf]

# Metabolic Syndrome and Periodontal Disease Progression in Men

Journal of Dental Research  
 DSI-DS3  
 © International & American Associations  
 for Dental Research 2016  
 Reprints and permissions:  
 sagepub.com/journalsPermissions.nav  
 DOI: 10.1177/0022034516641053  
 jdr.sagepub.com

E.K. Kaye<sup>1,2</sup>, N. Chen<sup>3</sup>, H.J. Cabral<sup>4</sup>, P. Vokonas<sup>2,5,6</sup>,  
 and R.I. Garcia<sup>1,2</sup>

## Appendix

**Appendix Table 1.** Baseline Characteristics of Cohort of Dental Longitudinal Study Participants by Number of Positive MetS Components (NCEP-ATP III Criteria).

| Characteristic                                        | Number of Positive MetS Conditions at Baseline |                    |                    |                    |                    |
|-------------------------------------------------------|------------------------------------------------|--------------------|--------------------|--------------------|--------------------|
|                                                       | 0                                              | 1                  | 2                  | 3                  | 4 or 5             |
| Number of participants                                | 103                                            | 166                | 213                | 153                | 125                |
| Age, y <sup>a</sup>                                   | 59 ± 8                                         | 60 ± 8             | 62 ± 8             | 61 ± 9             | 63 ± 9             |
| Number of teeth <sup>a</sup>                          | 23 ± 5                                         | 22 ± 6             | 21 ± 6             | 21 ± 7             | 21 ± 6             |
| Number of teeth with specified conditions             |                                                |                    |                    |                    |                    |
| ≥1 decayed/filled surface                             | 13 ± 5                                         | 13 ± 5             | 13 ± 5             | 12 ± 5             | 13 ± 5             |
| Bleeding on probing <sup>a</sup>                      | 5 ± 6                                          | 6 ± 6              | 6 ± 6              | 7 ± 7              | 9 ± 7              |
| Plaque on interproximal plus at least 1 other surface | 1.8 ± 4.3                                      | 2.3 ± 5.2          | 2.2 ± 4.8          | 2.6 ± 5.7          | 2.5 ± 5.1          |
| Pocket depth ≥5 mm (n) <sup>a</sup>                   | 0.8 ± 2.4<br>(103)                             | 1.0 ± 1.9<br>(164) | 1.0 ± 2.0<br>(212) | 1.5 ± 2.9<br>(152) | 2.1 ± 3.6<br>(120) |
| Clinical attachment loss ≥5 mm (n) <sup>a</sup>       | 1.2 ± 3.0<br>(96)                              | 1.6 ± 3.0<br>(151) | 1.9 ± 3.1<br>(196) | 1.9 ± 3.5<br>(145) | 2.5 ± 3.7<br>(118) |
| Alveolar bone loss ≥40% (n)                           | 0.9 ± 2.1<br>(98)                              | 1.0 ± 2.1<br>(153) | 1.0 ± 1.9<br>(201) | 1.2 ± 2.0<br>(146) | 1.1 ± 1.7<br>(115) |
| Mobility ≥0.5 mm <sup>a</sup>                         | 0.5 ± 1.3                                      | 0.5 ± 1.4          | 0.7 ± 1.7          | 1.0 ± 2.1          | 0.8 ± 1.6          |

Data are given as percentages or means ± SDs unless otherwise specified. NCEP-ATP III criteria include the presence of 3 or more conditions: hypertension, impaired glucose tolerance, low HDL, hypertriglyceridemia, or waist circumference ≥102 cm (men). HDL, high-density lipoprotein; IDF, International Diabetes Federation; MetS, metabolic syndrome; NCEP-ATP III, National Cholesterol Education Program Adult Treatment Panel III.

<sup>a</sup>Linear trend ( $P < 0.05$ , from analysis of variance).

<sup>1</sup>Department of Health Policy and Health Services Research, Boston University Henry M. Goldman School of Dental Medicine, Boston, MA, USA

<sup>2</sup>Department of Veterans Affairs, VA Boston Healthcare System, Boston, MA, USA

<sup>3</sup>Department of Pediatrics, Boston University School of Medicine, Boston, MA, USA

<sup>4</sup>Department of Biostatistics, Boston University School of Public Health, Boston, MA, USA

<sup>5</sup>Division of Preventive Medicine and Epidemiology, Department of Medicine, Boston University School of Medicine, Boston, MA, USA

<sup>6</sup>Department of Epidemiology, Boston University School of Public Health, Boston, MA, USA

### Corresponding Author:

E.K. Kaye, Department of Health Policy and Health Services Research, Boston University Henry M. Goldman School of Dental Medicine, 560 Harrison Avenue, Boston, MA 02118, USA.  
 Email: kralle@bu.edu

**Appendix Table 2.** Adjusted Hazards Ratios for Periodontal Disease Outcomes Attributable to MetS Status, from Tooth-Level, Time-Varying Proportional Hazards Regression Models: Comparison of Inclusion versus Exclusion of Appropriate Baseline Periodontal Disease Values.

| Disease Outcome                      | IDF Criteria <sup>a</sup> |                        | NCEP-ATP III Criteria <sup>b</sup> |                        |
|--------------------------------------|---------------------------|------------------------|------------------------------------|------------------------|
|                                      | With Baseline Value       | Without Baseline Value | With Baseline Value                | Without Baseline Value |
| Pocket depth $\geq 5$ mm             | 1.37<br>(1.14 to 1.65)    | 1.46<br>(1.21 to 1.75) | 1.32<br>(1.08 to 1.60)             | 1.41<br>(1.16 to 1.70) |
| Clinical attachment loss $\geq 5$ mm | 1.19<br>(1.00 to 1.41)    | 1.24<br>(1.04 to 1.48) | 1.12<br>(0.93 to 1.35)             | 1.16<br>(0.96 to 1.39) |
| Alveolar bone loss $\geq 40\%$       | 1.25<br>(1.00 to 1.56)    | 1.40<br>(1.09 to 1.78) | 1.10<br>(0.88 to 1.39)             | 1.26<br>(0.97 to 1.62) |
| Tooth mobility $\geq 0.5$ mm         | 1.43<br>(1.07 to 1.89)    | 1.47<br>(1.10 to 1.97) | 1.43<br>(1.07 to 1.90)             | 1.45<br>(1.08 to 1.94) |

Data are given hazards ratios (95% confidence intervals). All models were also adjusted for baseline age, highest level of education completed (high school, some college, college), and time-dependent values of cigarette use (no/yes), cigar use (no/yes), and plaque on tooth (none/interproximal only versus interproximal plus at least 1 other surface).

HDL, high-density lipoprotein; IDF, International Diabetes Federation; MetS, metabolic syndrome; NCEP-ATP III, National Cholesterol Education Program Adult Treatment Panel III.

<sup>a</sup>IDF criteria include the presence of 3 or more conditions: hypertension, impaired glucose tolerance, low HDL, hypertriglyceridemia, or waist circumference  $\geq 94$  cm (men).

<sup>b</sup>NCEP-ATP III criteria include the presence of 3 or more conditions: hypertension, impaired glucose tolerance, low HDL, hypertriglyceridemia, or waist circumference  $\geq 102$  cm (men).

**Appendix Table 3.** Characteristics of a Subset of Dental Longitudinal Study Participants at Examination Cycle 7, by Number of Positive MetS Components (IDF Criteria).

| Characteristic                                                  | Number of Positive MetS Conditions at Baseline |               |               |               |               |
|-----------------------------------------------------------------|------------------------------------------------|---------------|---------------|---------------|---------------|
|                                                                 | 0                                              | 1             | 2             | 3             | 4 or 5        |
| Number of participants                                          | 23                                             | 76            | 156           | 181           | 206           |
| Age, y                                                          | 65 $\pm$ 9                                     | 66 $\pm$ 8    | 67 $\pm$ 8    | 67 $\pm$ 8    | 67 $\pm$ 7    |
| Number of teeth                                                 | 22 $\pm$ 6                                     | 22 $\pm$ 6    | 21 $\pm$ 7    | 21 $\pm$ 6    | 20 $\pm$ 7    |
| Whole-mouth mean pocket depth, mm <sup>a</sup>                  | 2.8 $\pm$ 0.6                                  | 2.8 $\pm$ 0.5 | 3.0 $\pm$ 0.7 | 3.0 $\pm$ 0.6 | 3.2 $\pm$ 0.8 |
| Whole-mouth mean interproximal pocket depth, mm <sup>a</sup>    | 2.5 $\pm$ 0.6                                  | 2.5 $\pm$ 0.4 | 2.7 $\pm$ 0.6 | 2.7 $\pm$ 0.5 | 2.9 $\pm$ 0.7 |
| Whole-mouth mean attachment loss, mm                            | 3.6 $\pm$ 1.3                                  | 3.7 $\pm$ 1.2 | 3.9 $\pm$ 1.1 | 3.7 $\pm$ 1.2 | 4.0 $\pm$ 1.4 |
| Whole-mouth mean interproximal attachment loss, mm <sup>a</sup> | 2.7 $\pm$ 1.2                                  | 2.9 $\pm$ 1.2 | 3.2 $\pm$ 1.2 | 3.1 $\pm$ 1.2 | 3.4 $\pm$ 1.4 |

Data are given as percentages or means  $\pm$  SDs unless otherwise specified. IDF criteria include the presence of 3 or more conditions: hypertension, impaired glucose tolerance, low HDL, hypertriglyceridemia, or waist circumference  $\geq 94$  cm (men).

HDL, high-density lipoprotein; IDF, International Diabetes Federation; MetS, metabolic syndrome.

<sup>a</sup>Linear trend ( $P < 0.05$ , from analysis of variance).

**Appendix Table 4.** Adjusted Hazards Ratios for Periodontal Disease Outcomes Attributable to MetS Status and per Each Additional Positive MetS Component, from Tooth-Level, Time-Varying Proportional Hazards Regression Models, Examination Cycles 7 through 12 at a Mean Follow-up of 11.8 ± 5.1 y.

| Disease Outcome                                           | IDF Criteria <sup>a</sup> |                                  | NCEP-ATP III Criteria <sup>b</sup> |                                  |
|-----------------------------------------------------------|---------------------------|----------------------------------|------------------------------------|----------------------------------|
|                                                           | MetS versus No MetS       | Per Each Positive MetS Component | MetS versus No MetS                | Per Each Positive MetS Component |
| Pocket depth ≥5 mm <sup>c</sup>                           | 1.28<br>(1.04 to 1.58)    | 1.08<br>(0.98 to 1.19)           | 1.19<br>(0.96 to 1.48)             | 1.08<br>(0.98 to 1.20)           |
| Interproximal pocket depth ≥5 mm <sup>d</sup>             | 1.33<br>(1.08 to 1.65)    | 1.14<br>(1.03 to 1.26)           | 1.20<br>(0.97 to 1.49)             | 1.14<br>(1.03 to 1.25)           |
| Clinical attachment loss ≥5 mm <sup>e</sup>               | 1.08<br>(0.92 to 1.28)    | 1.01<br>(0.94 to 1.09)           | 1.06<br>(0.90 to 1.25)             | 1.03<br>(0.95 to 1.11)           |
| Interproximal clinical attachment loss ≥5 mm <sup>f</sup> | 1.03<br>(0.86 to 1.22)    | 1.02<br>(0.94 to 1.10)           | 1.04<br>(0.87 to 1.25)             | 1.03<br>(0.95 to 1.12)           |

Data are given hazards ratios (95% confidence intervals).

HDL, high-density lipoprotein; IDF, International Diabetes Federation; MetS, metabolic syndrome; NCEP-ATP III, National Cholesterol Education Program Adult Treatment Panel III.

<sup>a</sup>IDF criteria include the presence of 3 or more conditions: hypertension, impaired glucose tolerance, low HDL, hypertriglyceridemia, or waist circumference ≥94 cm (men).

<sup>b</sup>NCEP-ATP III criteria include the presence of 3 or more conditions: hypertension, impaired glucose tolerance, low HDL, hypertriglyceridemia, or waist circumference ≥ 102 cm (men).

<sup>c</sup>Adjusted for baseline age, highest level of education completed (high school, some college, college), pocket depth score, and time-dependent values of cigarette use (no/yes), cigar use (no/yes), and plaque on tooth (none/interproximal only versus interproximal plus at least 1 other surface).

<sup>d</sup>Adjusted for baseline age, education, clinical attachment loss score, and time-dependent values of cigarette use, cigar use, and plaque.

<sup>e</sup>Adjusted for baseline age, education, alveolar bone loss score, and time-dependent values of cigarette use, cigar use, and plaque.

<sup>f</sup>Adjusted for baseline age, education, mobility score, and time-dependent values of cigarette use, cigar use, and plaque.
